# Supplementary material for: Influence of gut microbiota on mucosal IgA antibody response to the polio vaccine
Source: PubMed Central journal article supplement (PMC7283253; doi:10.1038/s41541-020-0194-5), 2020-06-09
Supplement: 41541_2020_194_MOESM1_ESM.pdf [file 41541_2020_194_MOESM1_ESM.pdf]

# Supplementary Information

## Supplementary Figures

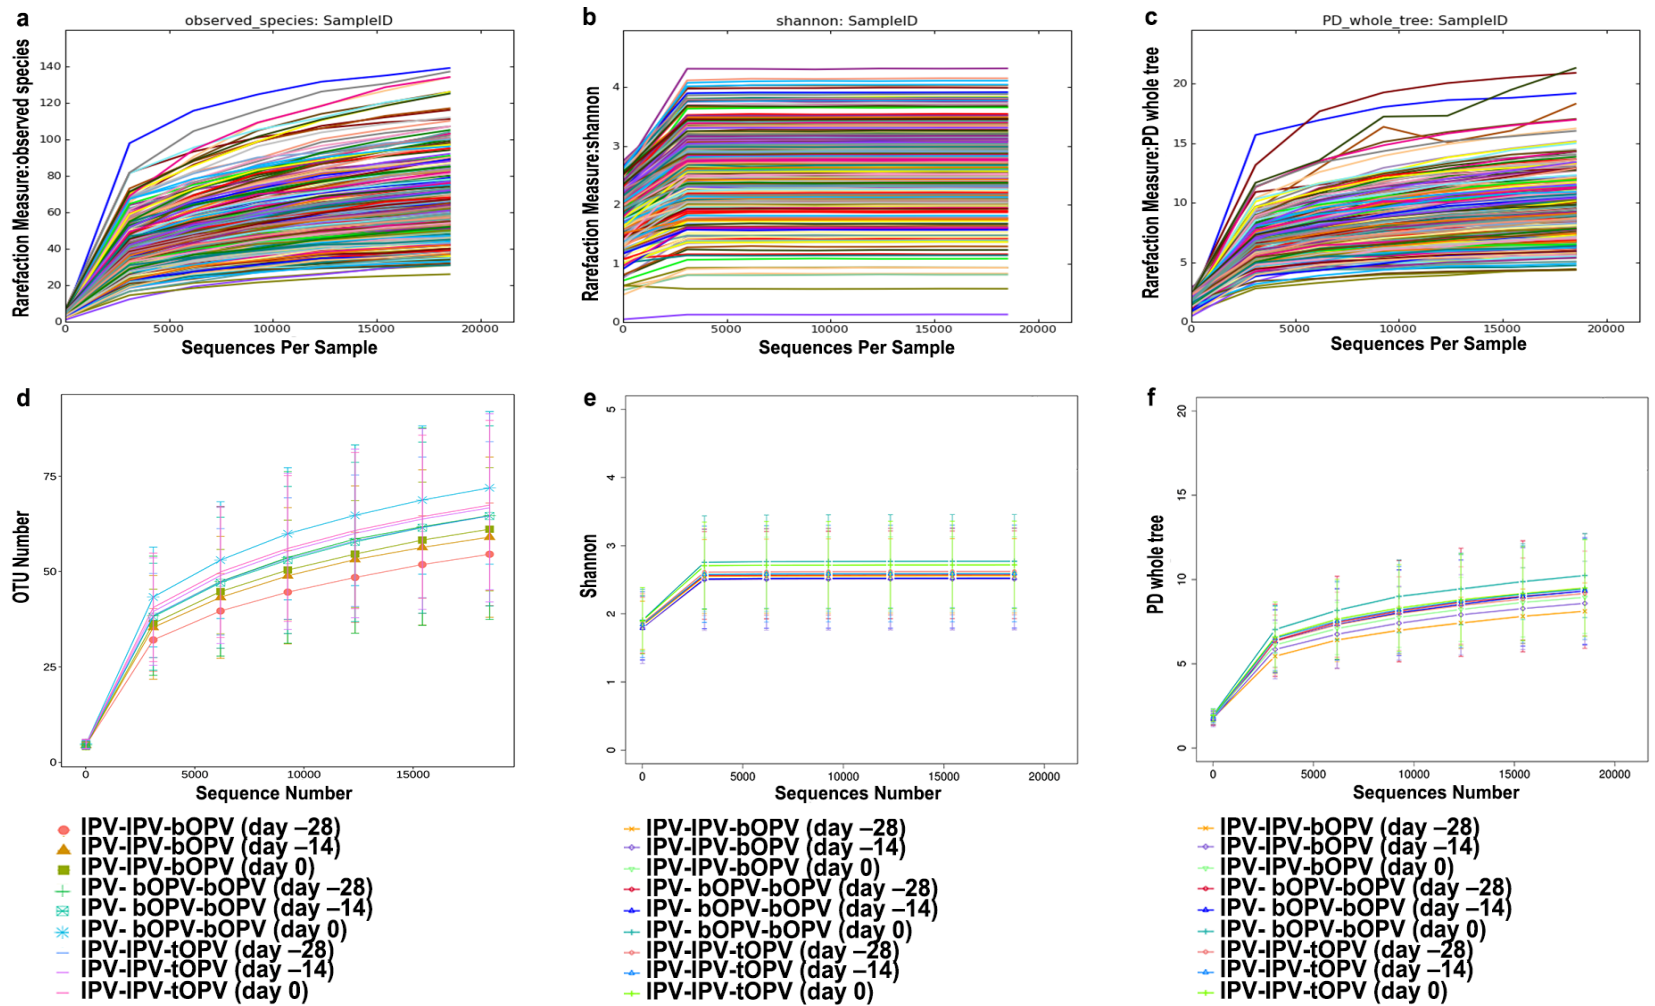

**Supplementary Figure 1.** Diversity of gut microbiota. **(a)** Rarefaction analysis of sampling by observed OTU method. **(b)** Shannon Diversity Index curves, which indicate the diversity of taxa in an individual sample. **(c)** Rarefaction analysis of sampling by PD whole tree method. **(d)** Rarefaction analysis of nine groups by observed OTU method. **(e)** Shannon Diversity Index curves, which indicate the diversity of taxa in nine groups. **(f)** Rarefaction analysis of 9 groups by PD whole tree method. Data in **(d)**, **(e)** and **(f)** are shown as mean  $\pm$  standard deviation. Nine groups: IPV-IPV-bOPV (day -28), n=34; IPV- bOPV-bOPV (day -28), n=34; IPV-IPV-tOPV (day -28), n=37; IPV-IPV-bOPV (day -14), n=33; IPV- bOPV-bOPV (day -14), n=34; IPV-IPV-tOPV (day -14), n=36; IPV-IPV-bOPV (day 0), n=34; IPV- bOPV-bOPV (day 0), n=34; IPV-IPV-tOPV (day 0), n=37.

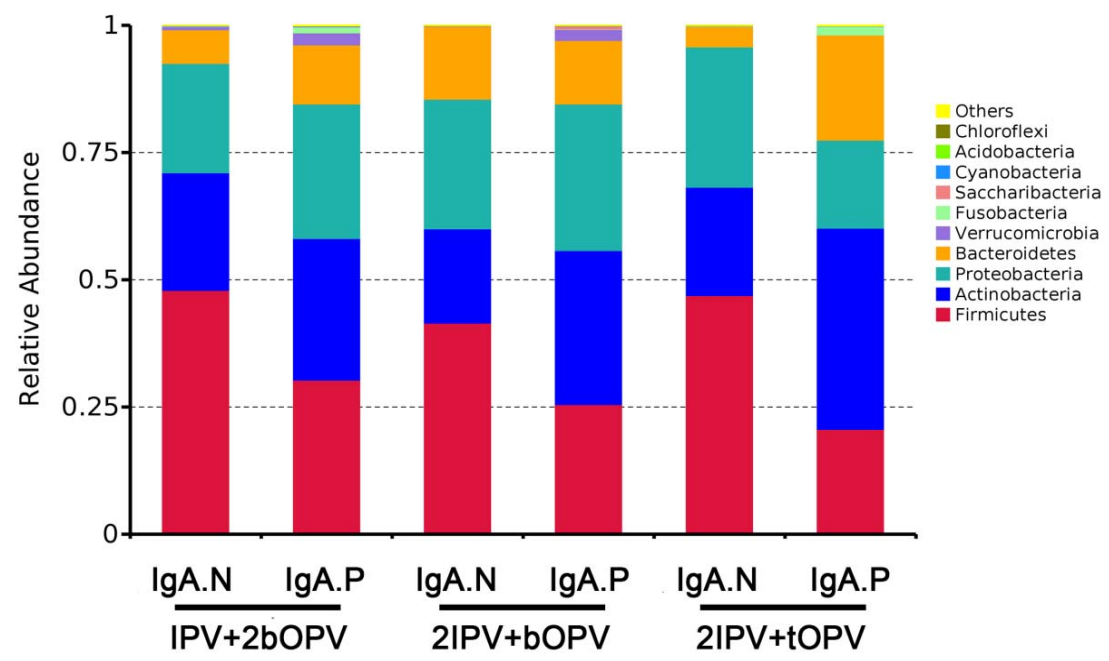

**Supplementary Figure 2.** Phylum-level compositions of the bacterial microbiota from IgA.N or IgA.P groups of different immunization schedules at the third vaccine dose. IgA.P: n=66; IgA.N: n=39.

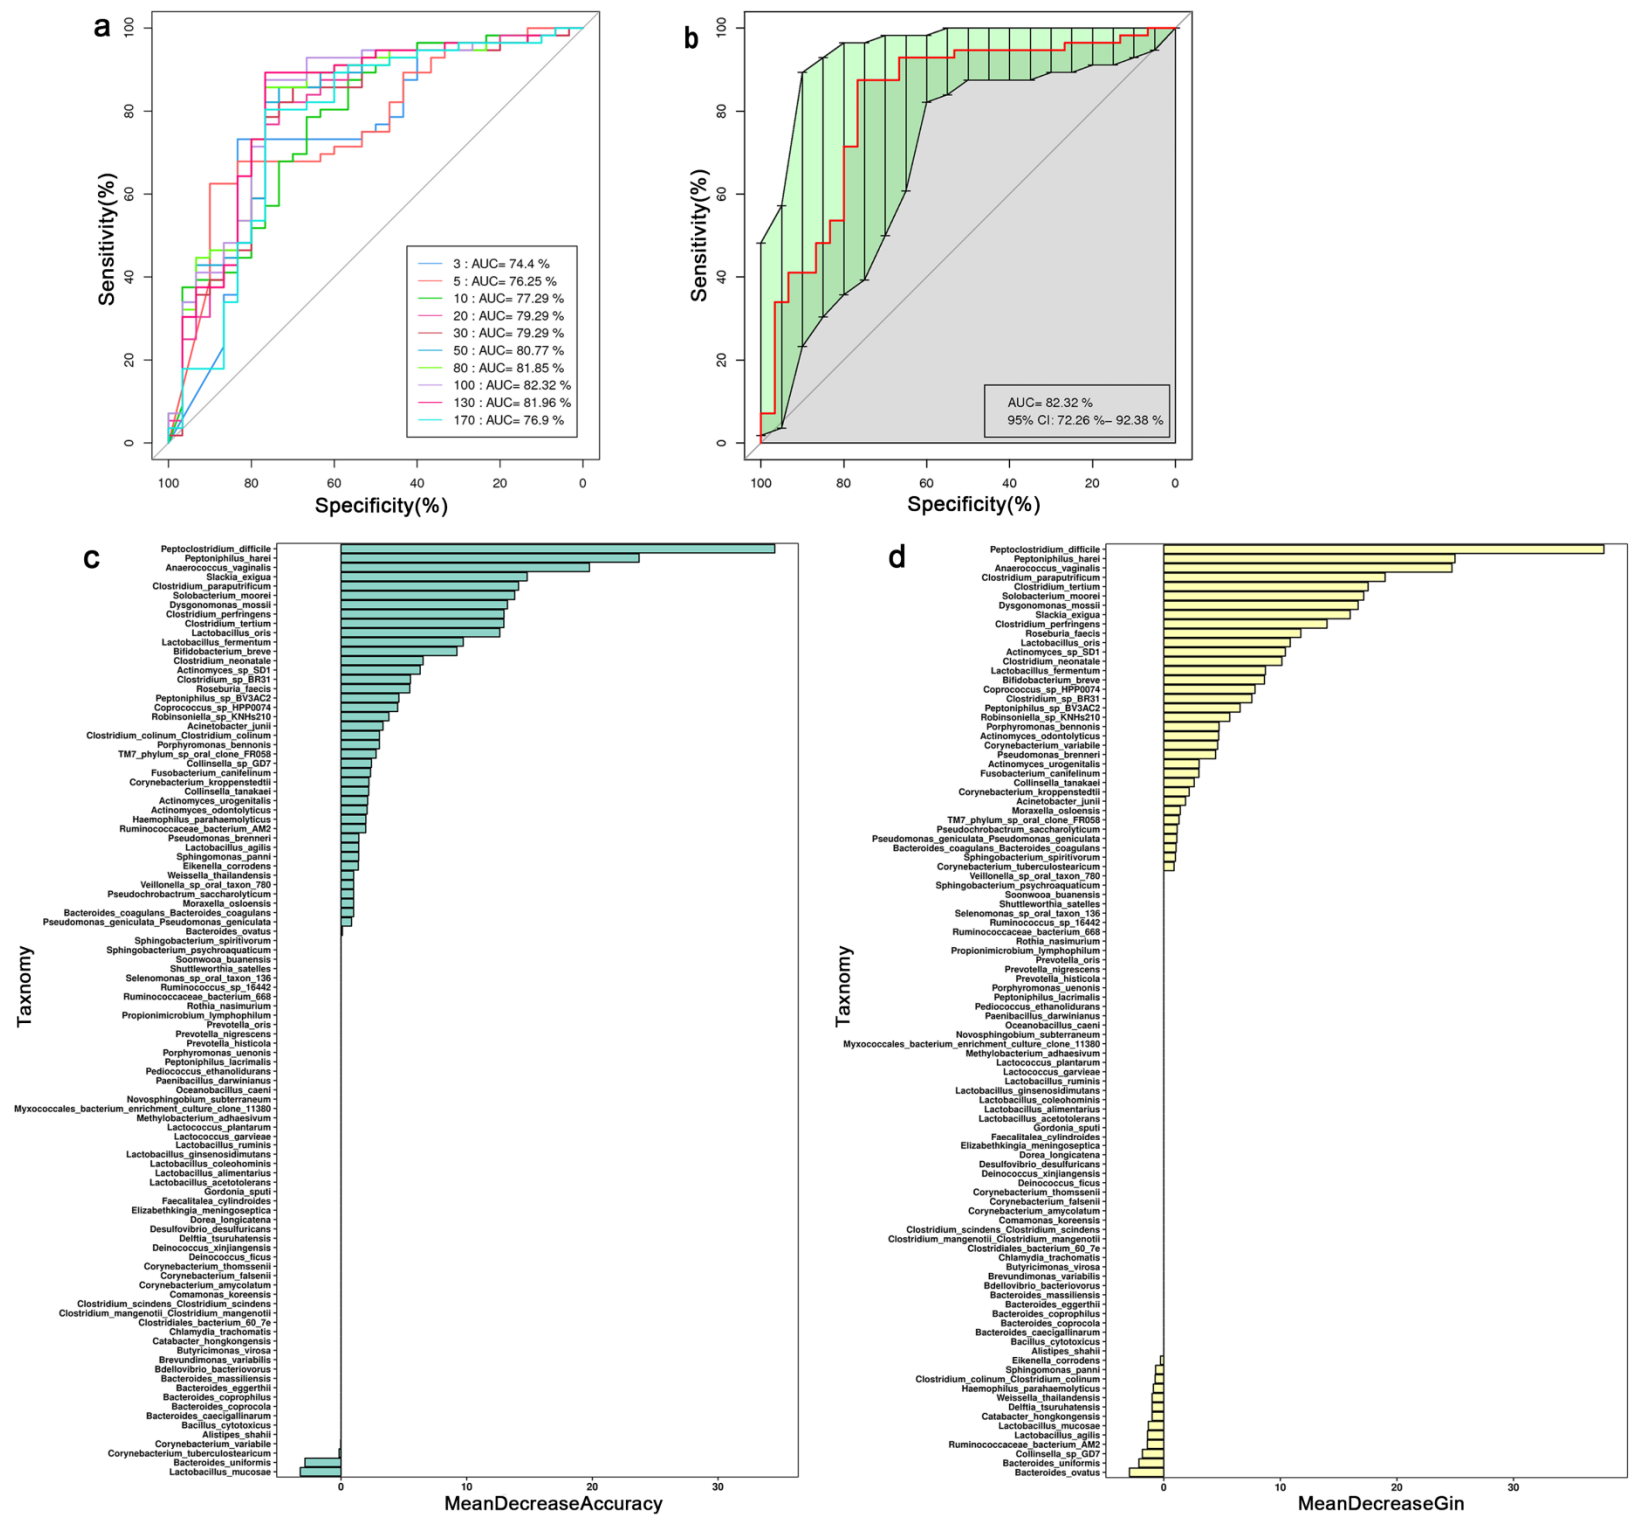

**Supplementary Figure 3.** Random forest feature selection for detecting poliovirus-specific IgA-positive infants.

(a) Receiver operating characteristic (ROC) curves for the random forest prediction model for distinguishing IgA.P-positive from IgA-negative infants, when 3,5,10,20,30,50,80,100,130,170 important variables were selected respectively to construct random forest models. (b) Receiver operating characteristic (ROC) curves for the random forest prediction model (important variables=100). (c and d) The highest-ranking corresponding species according to the random forest importance score (Mean Decrease Accuracy and Mean Decrease Gin) for the model predicting poliovirus-specific IgA-positive infants.

## Supplementary Tables

**Supplementary table 1.** The baseline characteristics of infants in each group

|                   | IPV+2bOPV (n=36) | 2IPV+bOPV (n=34) | 2IPV+tOPV (n=37) | p Value<br>(Pearson CHI-SQUARE) |
|-------------------|------------------|------------------|------------------|---------------------------------|
| <b>Sex</b>        |                  |                  |                  | 0.267                           |
| <b>Male</b>       | 18/36 (50%)      | 22/34 (64.7%)    | 17/37 (45.9%)    |                                 |
| <b>Female</b>     | 18/36 (50%)      | 12/34 (35.3%)    | 20/37 (54.1%)    |                                 |
| <b>Race</b>       |                  |                  |                  | 0.348                           |
| <b>Han</b>        | 9/36 (25%)       | 14/34 (41.2%)    | 11/37 (29.7%)    |                                 |
| <b>Minorities</b> | 27/36 (75%)      | 20/34 (58.8%)    | 26/37 (70.3%)    |                                 |
| <b>Feeding</b>    |                  |                  |                  | 0.294                           |

|                    |                |               |                |
|--------------------|----------------|---------------|----------------|
| <b>Breast fed</b>  | 26/36 (72.22%) | 19/34 (55.9%) | 26/37 (70.27%) |
| <b>Formula fed</b> | 10/36 (27.78%) | 15/34 (44.1%) | 11/37 (29.73%) |

**IgA positive rate**

|                |              |              |           |       |
|----------------|--------------|--------------|-----------|-------|
| <b>PV1-IgA</b> | 0/36 (0%)    | 0/34 (0%)    | 0/35 (0%) | 1     |
| <b>PV2-IgA</b> | 1/36 (2.78%) | 2/34 (5.88%) | 0/35 (0%) | 0.317 |
| <b>PV3-IgA</b> | 1/36 (2.78%) | 0/34 (0%)    | 0/35 (0%) | 1     |

---

Data are n(%).

**Supplementary Table 2.** Alpha and beta diversity of gut microbiota in breast-fed and formula-fed infants

|                                         | <b>Days before Vaccination</b> | <b>Breast fed (n=70)</b> | <b>Formula fed (n=35)</b> | <b>p Value</b> | <b>Test Method</b> |
|-----------------------------------------|--------------------------------|--------------------------|---------------------------|----------------|--------------------|
| <b>Alpha diversity</b>                  |                                |                          |                           |                |                    |
| <b>Observed_species</b>                 | day-28                         | 58.31(52.75-63.88)       | 63.26(57.64-68.88)        | 0.5587         | Wilcoxon test      |
|                                         | day-14                         | 62.31(55.48-69.15)       | 66.16(59.77-72.55)        | 0.5845         | Wilcoxon test      |
|                                         | day0                           | 66.94(60.3-73.59)        | 68.3(63.2-73.4)           | 0.865          | Wilcoxon test      |
| <b>Shannon</b>                          | day-28                         | 2.579(2.429-2.729)       | 2.532(2.332-2.732)        | 0.2577         | Wilcoxon test      |
|                                         | day-14                         | 2.523(2.328-2.718)       | 2.546(2.324-2.769)        | 0.5943         | Wilcoxon test      |
|                                         | day0                           | 2.604(2.446-2.762)       | 2.844(2.648-3.039)        | 0.1467         | Wilcoxon test      |
| <b>Beta diversity</b>                   |                                |                          |                           |                |                    |
| <b>UniFrac distance between samples</b> | day-28                         | $R^2=0.00695$            |                           | 0.613          | Adonis             |
|                                         | day-14                         | $R^2=0.00563$            |                           | 0.712          | Adonis             |
|                                         | day0                           | $R^2=0.00209$            |                           | 0.976          | Adonis             |

**Supplementary Table 3.** Relative abundance of gut microbiota in class-, order-, family- and genus-level between breast fed and formula fed (which have significant difference between IgA.N and IgA.P)

| <b>Taxa</b>                                        | <b>Avg(Breast)</b> | <b>Sd(Breast)</b> | <b>Avg(Formula)</b> | <b>Sd(Formula)</b> | <b>FDR-corrected p.value,( Wilcoxon test)</b> |
|----------------------------------------------------|--------------------|-------------------|---------------------|--------------------|-----------------------------------------------|
| <b>Phylum</b>                                      |                    |                   |                     |                    |                                               |
| <b>k__Bacteria;p__Firmicutes;</b>                  | 0.334363415        | 0.229133954       | 0.308885198         | 0.190199804        | 1                                             |
| <b>k__Bacteria;p__Actinobacteria;</b>              | 0.283048627        | 0.199397849       | 0.287353322         | 0.189522818        | 1                                             |
| <b>k__Bacteria;p__Proteobacteria;</b>              | 0.239794082        | 0.212232333       | 0.239793588         | 0.212465481        | 1                                             |
| <b>k__Bacteria;p__Bacteroidetes;</b>               | 0.130564865        | 0.224340776       | 0.132851903         | 0.197536607        | 1                                             |
| <b>Class</b>                                       |                    |                   |                     |                    |                                               |
| <b>k__Bacteria;p__Actinobacteria;c__unidentifi</b> | 0.267144637        | 0.192268131       | 0.274495092         | 0.186725611        | 1                                             |
| <b>ed_Actinobacteria;</b>                          |                    |                   |                     |                    |                                               |
| <b>k__Bacteria;p__Firmicutes;c__Clostridia;</b>    | 0.069901243        | 0.114679365       | 0.099950572         | 0.14106059         | 1                                             |
| <b>Order</b>                                       |                    |                   |                     |                    |                                               |

---

|                                                    |             |             |             |            |          |
|----------------------------------------------------|-------------|-------------|-------------|------------|----------|
| <b>k__Bacteria;p__Firmicutes;c__Clostridia;o__</b> | 0.069900748 | 0.114679665 | 0.099950572 | 0.14106059 | 0.619123 |
|----------------------------------------------------|-------------|-------------|-------------|------------|----------|

**Clostridiales;**

|                                                    |             |             |             |             |          |
|----------------------------------------------------|-------------|-------------|-------------|-------------|----------|
| <b>k__Bacteria;p__Actinobacteria;c__unidentifi</b> | 0.254372905 | 0.184120289 | 0.266671609 | 0.186353767 | 0.732478 |
|----------------------------------------------------|-------------|-------------|-------------|-------------|----------|

**ed\_Actinobacteria;o\_\_Bifidobacteriales;**

**Family**

|                                                    |             |            |             |             |          |
|----------------------------------------------------|-------------|------------|-------------|-------------|----------|
| <b>k__Bacteria;p__Firmicutes;c__Clostridia;o__</b> | 0.021146831 | 0.05268386 | 0.038709135 | 0.088350966 | 0.755154 |
|----------------------------------------------------|-------------|------------|-------------|-------------|----------|

**Clostridiales;f\_\_Clostridiaceae\_1;**

|                                                    |             |             |             |             |          |
|----------------------------------------------------|-------------|-------------|-------------|-------------|----------|
| <b>k__Bacteria;p__Actinobacteria;c__unidentifi</b> | 0.254372905 | 0.184120289 | 0.266671609 | 0.186353767 | 0.868298 |
|----------------------------------------------------|-------------|-------------|-------------|-------------|----------|

**ed\_Actinobacteria;o\_\_Bifidobacteriales;f\_\_Bi**

**fidobacteriaceae;**

|                                                    |            |             |             |             |          |
|----------------------------------------------------|------------|-------------|-------------|-------------|----------|
| <b>k__Bacteria;p__Firmicutes;c__Clostridia;o__</b> | 0.01431636 | 0.047760222 | 0.030448708 | 0.068664603 | 0.755154 |
|----------------------------------------------------|------------|-------------|-------------|-------------|----------|

**Clostridiales;f\_\_Peptostreptococcaceae;**

**Genus**

---



---

|                                                                                                                                    |             |             |             |             |          |
|------------------------------------------------------------------------------------------------------------------------------------|-------------|-------------|-------------|-------------|----------|
| <b>k__Bacteria;p__Firmicutes;c__Clostridia;o__Clostridiales;f__Clostridiaceae_1;g__Clostridium_sensu_stricto_1;</b>                | 0.021137934 | 0.052685914 | 0.038708147 | 0.088351411 | 0.895759 |
| <b>k__Bacteria;p__Actinobacteria;c__unidentified_Actinobacteria;o__Bifidobacteriales;f__Bifidobacteriaceae;g__Bifidobacterium;</b> | 0.254367963 | 0.18411413  | 0.266668644 | 0.186354133 | 1        |

---

**Supplementary Table 4.** Alpha and beta diversity of gut microbiota in different immunization schedules

|                          | Days before<br>Vaccination | 2IPV+bOPV          | IPV+2bOPV          | 2IPV+tOPV          | P Value                                                                                              | Test Method   |
|--------------------------|----------------------------|--------------------|--------------------|--------------------|------------------------------------------------------------------------------------------------------|---------------|
| <b>Alpha diversity</b>   |                            |                    |                    |                    |                                                                                                      |               |
| <b>Observed_ species</b> | day-28                     | 51.91(47.14-56.68) | 62.09(53.87-70.31) | 62.19(55.91-68.47) | 0.023(2IPV+bOPV Vs 2IPV+tOPV);<br>0.0946(2IPV+bOPV Vs IPV+2bOPV);<br>0.5674(2IPV+tOPV Vs IPV+2bOPV)  | Wilcoxon test |
|                          | day-14                     | 57.06(49.53-64.59) | 62.09(53.87-70.31) | 65.03(56.61-73.44) | 0.1921(2IPV+bOPV Vs 2IPV+tOPV);<br>0.3424(2IPV+bOPV Vs IPV+2bOPV);<br>0.7297(2IPV+tOPV Vs IPV+2bOPV) | Wilcoxon test |
|                          | day0                       | 59.71(53.96-65.45) | 69(62.15-75.85)    | 65.62(58.36-72.89) | 0.3083(2IPV+bOPV Vs 2IPV+tOPV);<br>0.0709(2IPV+bOPV Vs IPV+2bOPV);<br>0.4074(2IPV+tOPV Vs IPV+2bOPV) | Wilcoxon test |

|                |        |                    |                    |                    |                                                                                                         |               |
|----------------|--------|--------------------|--------------------|--------------------|---------------------------------------------------------------------------------------------------------|---------------|
| <b>Shannon</b> | day-28 | 2.532(2.337-2.726) | 2.55(2.325-2.774)  | 2.599(2.386-2.811) | 0.576(2IPV+bOPV Vs 2IPV+tOPV);<br>0.9915(2IPV+bOPV Vs IPV+2bOPV);<br>0.5686(2IPV+tOPV Vs IPV+2bOPV)     | Wilcoxon test |
|                | day-14 | 2.5(2.225-2.775)   | 2.498(2.234-2.762) | 2.592(2.349-2.836) | 0.9115(2IPV+bOPV Vs 2IPV+tOPV);<br>0.7884(2IPV+bOPV Vs IPV+2bOPV);<br>0.8711(2IPV+tOPV Vs IPV+2bOPV)    | Wilcoxon test |
|                | day0   | 2.586(2.393-2.779) | 2.772(2.529-3.014) | 2.718(2.5-2.936)   | 0.3292(2IPV+bOPV Vs 2IPV+tOPV);<br>0.2676(2IPV+bOPV Vs<br>IPV+2bOPV); 0.8758(2IPV+tOPV Vs<br>IPV+2bOPV) | Wilcoxon test |

### Beta

### diversity

|                 |        |                                                                    |  |                                |        |
|-----------------|--------|--------------------------------------------------------------------|--|--------------------------------|--------|
| <b>UniFrac</b>  | day-28 | R <sup>2</sup> =0.00703(2IPV+bOPV Vs 2IPV+tOPV); 0.00353(2IPV+bOPV |  | 0.023(2IPV+bOPV Vs 2IPV+tOPV); | Adonis |
| <b>distance</b> |        | Vs IPV+2bOPV); 0.01673(2IPV+tOPV Vs IPV+2bOPV)                     |  | 0.944(2IPV+bOPV Vs IPV+2bOPV); |        |

| between samples | 0.304(2IPV+tOPV Vs IPV+2bOPV)                                                                                     |                                                                                                   |        |
|-----------------|-------------------------------------------------------------------------------------------------------------------|---------------------------------------------------------------------------------------------------|--------|
| day-14          | $R^2=0.02522(2IPV+bOPV \text{ Vs } 2IPV+tOPV)$ ; 0.01963(2IPV+bOPV Vs IPV+2bOPV); 0.01331(2IPV+tOPV Vs IPV+2bOPV) | 0.243(2IPV+bOPV Vs 2IPV+tOPV);<br>0.252(2IPV+bOPV Vs IPV+2bOPV);<br>0.439(2IPV+tOPV Vs IPV+2bOPV) | Adonis |
| day0            | $R^2=0.01558(2IPV+bOPV \text{ Vs } 2IPV+tOPV)$ ; 0.01276(2IPV+bOPV Vs IPV+2bOPV); 0.01331(2IPV+tOPV Vs IPV+2bOPV) | 0.336(2IPV+bOPV Vs 2IPV+tOPV);<br>0.502(2IPV+bOPV Vs IPV+2bOPV);<br>0.196(2IPV+tOPV Vs IPV+2bOPV) | Adonis |

**Supplementary Table 5.** Relative abundance of gut microbiota in phylum-level and class-level from IgA.N or IgA.P groups (The top 10 phylum-level and all detected 36 class-level members were analyzed)

| <b>Taxa</b>                           | <b>Avg(IgA.N)</b> | <b>Sd(IgA.N)</b> | <b>Avg(IgA.P)</b> | <b>Sd(IgA.P)</b> | <b>FDR-corrected<br/>p.value,( Wilcoxon test)</b> |
|---------------------------------------|-------------------|------------------|-------------------|------------------|---------------------------------------------------|
| <b>Phylum</b>                         |                   |                  |                   |                  |                                                   |
| <b>Total</b>                          |                   |                  |                   |                  |                                                   |
| <b>k__Bacteria;p__Firmicutes;</b>     | 0.44896547        | 0.237625754      | 0.25308042        | 0.165502293      | 0.000188342                                       |
| <b>k__Bacteria;p__Actinobacteria;</b> | 0.206097883       | 0.153462956      | 0.330811226       | 0.203439407      | 0.008713709                                       |
| <b>k__Bacteria;p__Proteobacteria;</b> | 0.249274737       | 0.235927446      | 0.234259766       | 0.196999735      | 0.690267132                                       |
| <b>k__Bacteria;p__Bacteroidetes;</b>  | 0.092695209       | 0.172047847      | 0.15414263        | 0.234788281      | 0.390750513                                       |
| <b>2IPV+bOPV</b>                      |                   |                  |                   |                  |                                                   |
| <b>k__Bacteria;p__Firmicutes;</b>     | 0.415814904       | 0.25040933       | 0.255461662       | 0.193828382      | 0.287851552                                       |
| <b>k__Bacteria;p__Actinobacteria;</b> | 0.185256872       | 0.13027418       | 0.303129846       | 0.146490266      | 0.133909567                                       |
| <b>k__Bacteria;p__Proteobacteria;</b> | 0.254232355       | 0.245904776      | 0.287484685       | 0.238750653      | 0.630722125                                       |

|                                          |             |             |             |             |             |
|------------------------------------------|-------------|-------------|-------------|-------------|-------------|
| <b>k__Bacteria;p__Bacteroidetes;</b>     | 0.14359275  | 0.231310752 | 0.124851934 | 0.23830195  | 0.630722125 |
| <b>2IPV+tOPV</b>                         |             |             |             |             |             |
| <b>k__Bacteria;p__Firmicutes;</b>        | 0.46951768  | 0.190117369 | 0.206862181 | 0.149933529 | 0.000550843 |
| <b>k__Bacteria;p__Actinobacteria;</b>    | 0.212894987 | 0.149294052 | 0.395575499 | 0.24137453  | 0.018024404 |
| <b>k__Bacteria;p__Proteobacteria;</b>    | 0.275982788 | 0.240510531 | 0.172817425 | 0.150439691 | 0.065661136 |
| <b>k__Bacteria;p__Bacteroidetes;</b>     | 0.040607445 | 0.096801368 | 0.206653253 | 0.272617165 | 0.018024404 |
| <b>IPV+2bOPV</b>                         |             |             |             |             |             |
| <b>k__Bacteria;p__Firmicutes;</b>        | 0.479608206 | 0.273508519 | 0.303550529 | 0.151282668 | 0.554358392 |
| <b>k__Bacteria;p__Actinobacteria;</b>    | 0.231437271 | 0.196320896 | 0.278094189 | 0.178782175 | 0.781649019 |
| <b>k__Bacteria;p__Proteobacteria;</b>    | 0.214939513 | 0.23406162  | 0.264379176 | 0.199662338 | 0.781649019 |
| <b>k__Bacteria;p__Bacteroidetes;</b>     | 0.066220645 | 0.096653921 | 0.116436955 | 0.178071114 | 1           |
| <b>Class</b>                             |             |             |             |             |             |
| <b>Total</b>                             |             |             |             |             |             |
| <b>k__Bacteria;p__Actinobacteria;c__</b> | 0.1762528   | 0.1211282   | 0.29826554  | 0.14875755  | 0.022593    |

|                                                                      |           |           |            |            |          |
|----------------------------------------------------------------------|-----------|-----------|------------|------------|----------|
| <b>unidentified_Actinobacteria;</b>                                  |           |           |            |            |          |
| <b>k__Bacteria;p__Firmicutes;c__Clostridia;</b>                      | 0.1498184 | 0.1640202 | 0.03862163 | 0.06562775 | 2.22E-05 |
| <b>IPV+2bOPV</b>                                                     |           |           |            |            |          |
| <b>k__Bacteria;p__Actinobacteria;c__unidentified_Actinobacteria;</b> | 0.2118696 | 0.1800827 | 0.264838   | 0.1770491  | 0.362941 |
| <b>k__Bacteria;p__Firmicutes;c__Clostridia;</b>                      | 0.1892917 | 0.16727   | 0.04354896 | 0.06436669 | 0.009919 |
| <b>2IPV+bOPV</b>                                                     |           |           |            |            |          |
| <b>k__Bacteria;p__Actinobacteria;c__unidentified_Actinobacteria;</b> | 0.1762528 | 0.1211282 | 0.29826554 | 0.14875755 | 0.022593 |
| <b>k__Bacteria;p__Firmicutes;c__Clostridia;</b>                      | 0.136105  | 0.179272  | 0.01857392 | 0.02141924 | 0.016191 |
| <b>2IPV+tOPV</b>                                                     |           |           |            |            |          |
| <b>k__Bacteria;p__Actinobacteria;c__unidentified_Actinobacteria;</b> | 0.189342  | 0.1239058 | 0.37443376 | 0.23875597 | -0.17596 |
| <b>k__Bacteria;p__Firmicutes;c__Clostridia;</b>                      | 0.1314819 | 0.1430246 | 0.0474162  | 0.08293812 | -0.17596 |

The samples were collected at the day of last dose of OPV(Day 0); IgA.P: n=66; IgA.N: n=39.

**Supplementary Table 6.** Relative abundance of gut microbiota in class-, order-, family- and genus-level which have significant difference between IgA.N and IgA.P (P<0.05). (All detected members were analyzed, including 36 class-level, 60 order-level, 102 family-level and 252 genus-level members, and only the species with differences in relative abundance were shown in the table)

| Taxa                                          | Avg(IgA.N)  | Sd(IgA.N) | Avg(IgA.P) | Sd(IgA.P)  | FDR-corrected p.value,( Wilcoxon test) |
|-----------------------------------------------|-------------|-----------|------------|------------|----------------------------------------|
| <b>Class</b>                                  |             |           |            |            |                                        |
| k__Bacteria;p__Actinobacteria;c__unidentified | 0.176252814 | 0.1211282 | 0.29826554 | 0.14875755 | 0.006797                               |
| _Actinobacteria;                              |             |           |            |            |                                        |
| k__Bacteria;p__Firmicutes;c__Clostridia;      | 0.149818396 | 0.1640202 | 0.03862163 | 0.06562775 | 2.22E-05                               |
| <b>Order</b>                                  |             |           |            |            |                                        |
| k__Bacteria;p__Firmicutes;c__Clostridia;o__Cl | 0.149817509 | 0.164021  | 0.03862163 | 0.06562775 | 7.73E-05                               |
| ostridiales;                                  |             |           |            |            |                                        |
| k__Bacteria;p__Actinobacteria;c__unidentified | 0.181495735 | 0.1357878 | 0.30396449 | 0.19439068 | 0.023376                               |
| _Actinobacteria;o__Bifidobacteriales;         |             |           |            |            |                                        |
| <b>Family</b>                                 |             |           |            |            |                                        |



---

|                                                      |             |           |            |            |          |
|------------------------------------------------------|-------------|-----------|------------|------------|----------|
| <b>k__Bacteria;p__Firmicutes;c__Clostridia;o__Cl</b> | 0.059922213 | 0.1001101 | 0.00755322 | 0.01568595 | 0.001293 |
| <b>ostridiales;f__Clostridiaceae_1;</b>              |             |           |            |            |          |

|                                                                    |             |           |            |            |          |
|--------------------------------------------------------------------|-------------|-----------|------------|------------|----------|
| <b>k__Bacteria;p__Actinobacteria;c__unidentified</b>               | 0.181495735 | 0.1357878 | 0.30396449 | 0.19439068 | 0.023421 |
| <b>_Actinobacteria;o__Bifidobacteriales;f__Bifidobacteriaceae;</b> |             |           |            |            |          |

|                                                      |             |           |            |            |          |
|------------------------------------------------------|-------------|-----------|------------|------------|----------|
| <b>k__Bacteria;p__Firmicutes;c__Clostridia;o__Cl</b> | 0.043782792 | 0.0826305 | 0.00545731 | 0.02093508 | 0.023421 |
| <b>ostridiales;f__Peptostreptococcaceae;</b>         |             |           |            |            |          |

#### Genus

|                                                                        |             |           |            |            |          |
|------------------------------------------------------------------------|-------------|-----------|------------|------------|----------|
| <b>k__Bacteria;p__Firmicutes;c__Clostridia;o__Cl</b>                   | 0.059913341 | 0.1001142 | 0.00754902 | 0.01568654 | 0.002726 |
| <b>ostridiales;f__Clostridiaceae_1;g__Clostridium_sensu_stricto_1;</b> |             |           |            |            |          |

|                                                                                       |             |           |            |            |         |
|---------------------------------------------------------------------------------------|-------------|-----------|------------|------------|---------|
| <b>k__Bacteria;p__Actinobacteria;c__unidentified</b>                                  | 0.181494848 | 0.1357874 | 0.30395873 | 0.19438657 | 0.06711 |
| <b>_Actinobacteria;o__Bifidobacteriales;f__Bifidobacteriaceae;g__Bifidobacterium;</b> |             |           |            |            |         |

---

The samples were collected at the day of last dose of OPV(Day 0); IgA.P: n=66; IgA.N: n=39.
