# Supplementary material for: Influence of gut microbiota on mucosal IgA antibody response to the polio vaccine
Source: PubMed Central journal article supplement (PMC7283253; doi:10.1038/s41541-020-0194-5), 2020-06-09
Supplement: 41541_2020_194_MOESM2_ESM.pdf [file 41541_2020_194_MOESM2_ESM.pdf]

To view the full contents of this document, you need a later version of the PDF viewer. You can upgrade to the latest version of Adobe Reader from [www.adobe.com/products/acrobat/readstep2.html](http://www.adobe.com/products/acrobat/readstep2.html)

For further support, go to [www.adobe.com/support/products/acrreader.html](http://www.adobe.com/support/products/acrreader.html)
